# Supplementary material
Source: PubMed Central journal article supplement (PMC4015079)
Supplement: Supp_Fig1.pdf [file Supp_Fig1.pdf]

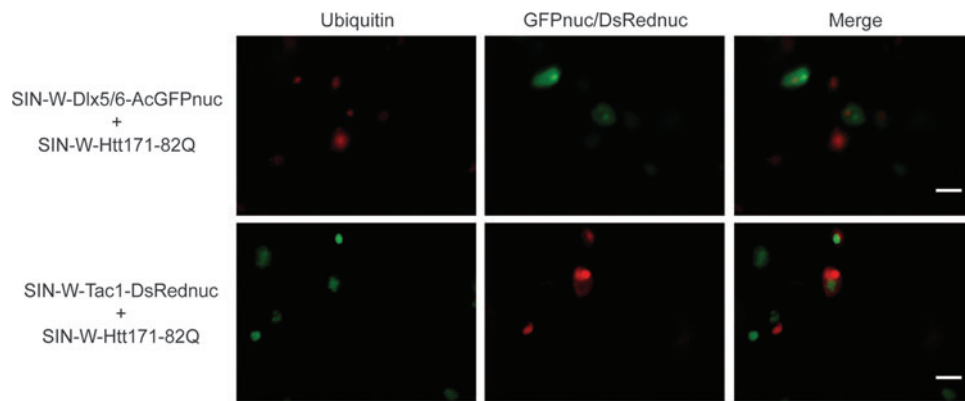

**SUPPLEMENTARY FIG. S1.** Effect of huntingtin overexpression on the transcriptional activity of the promoters. Double staining showing the formation of Htt aggregates labeled with ubiquitin and co-localization with LV-Dlx5/6 and LV-Tac1 expressing the reporter genes. Scale bar = 10  $\mu$ m.
