# Supplementary material
Source: PubMed Central journal article supplement (PMC4015079)
Supplement: Supp_Table1.pdf [file Supp_Table1.pdf]

SUPPLEMENTARY TABLE S1. LIST OF NEURONAL PROMOTERS USED IN THE STUDY WITH THE EXPECTED CELL-TYPE SPECIFICITY IN THE STRIATUM AND HIPPOCAMPUS

| Promoter                                               | Size (kb) | Striatal specificity  | Hippocampal specificity                                   |
|--------------------------------------------------------|-----------|-----------------------|-----------------------------------------------------------|
| PGK (mouse)<br>Phosphoglycerate kinase 1               | 0.5       | Ubiquitous            | Ubiquitous                                                |
| NSE (rat)<br>Neuron-specific enolase                   | 1.8       | Pan-neuronal          | Pan-neuronal                                              |
| GAD 67 (mouse)<br>Glutamate acid decarboxylase, 67 kDa | 3.7       | GABAergic neurons     | GABAergic neurons                                         |
| Dlx5/6 (mouse)<br>Homeobox                             | 0.5       | GABAergic neurons     | GABAergic interneurons                                    |
| GluR1 (rat)<br>Glutamate receptor 1                    | 1.4       | GABAergic neurons     | CA1-CA3 neurons<br>Few neurons in dentate gyrus           |
| Drd1a (mouse)<br>Dopamine receptor mouse D1a           | 1.3       | Striatonigral pathway | Dopaminergic neurons                                      |
| Tac1 (rat)<br>Preprotachykinin 1, Substance P          | 0.9       | Striatonigral pathway | Hilar region of dentate gyrus<br>Strata oriens of CA1-CA3 |
